# Supplementary material for: Extract from the Zooxanthellate Jellyfish Cotylorhiza tuberculata Modulates Gap Junction Intercellular Communication in Human Cell Cultures
Source: Mar Drugs. 2013 May 22;11(5):1728–62. doi: 10.3390/md11051728 (PMC3707171; doi:10.3390/md11051728)
Supplement: Supplementary File 1 — Supplementary Information (PDF, 439 KB) [file marinedrugs-11-01728-s001.pdf]

## Supplementary Information

**Table S1.** Biometric measures and dry weight of *Cotylorhiza tuberculata* specimens caught in the summer 2011.

| Specimens | Umbrella diameter (cm) | Total fresh weight (g) | Fresh weight/ diameter ratio | Dry weight (g) | Dry weight (% of FW) |
|-----------|------------------------|------------------------|------------------------------|----------------|----------------------|
| C-11-002  | 6.3                    | 19.2                   | 3.05                         | 0.91           | 4.7                  |
| C-11-003  | 7.4                    | 32.0                   | 4.32                         | 1.91           | 6.0                  |
| C-11-007  | 7.5                    | 30.3                   | 4.04                         | 1.69           | 5.6                  |
| C-11-005  | 8.0                    | 39.4                   | 4.93                         | 2.14           | 5.4                  |
| C-11-008  | 8.3                    | 38.3                   | 4.61                         | 2.10           | 5.5                  |
| C-11-004  | 9.3                    | 52.5                   | 5.64                         | 2.86           | 5.5                  |
| C-11-006  | 16.0                   | 428.4                  | 26.78                        | 97.25          | 22.7                 |
| C-11-009  | 17.5                   | 491.4                  | 28.08                        | 159.21         | 32.4                 |
| C-11-011  | 18.0                   | 389.5                  | 21.64                        | 40.61          | 8.3                  |
| C-11-001  | 19.0                   | 489.3                  | 25.75                        | 104.78         | 26.9                 |
| C-11-010  | 25.5                   | 1080.0                 | 42.35                        | 212.76         | 19.8                 |
| C-11-012  | 25.5                   | 1179.0                 | 46.24                        | 409.11         | 34.7                 |
| C-11-013  | 29.0                   | 1770.0                 | 61.04                        | 507.99         | 28.7                 |

**Table S2.** Fresh and dry weights of *Cotylorhiza tuberculata* specimens and of the lyophilized hydro-alcoholic extract. Data are referred to some representative extractions.

| Specimen        | Total lyophilized jellyfish (TE) |                            | Lyophilized hydro-alcoholic extract |                  |                            |
|-----------------|----------------------------------|----------------------------|-------------------------------------|------------------|----------------------------|
|                 | Dry weight                       | Percentage of fresh weight | Dry weight                          | Percentage of TE | Percentage of fresh weight |
|                 | (g)                              | (% of FW)                  | (g)                                 | (% of DW)        | (% of FW)                  |
| #1              | 31.91                            | 22.7                       | 13.16                               | 41.3             | 9.4                        |
| #2              | 65.91                            | 32.4                       | 26.68                               | 40.5             | 13.1                       |
| #3              | 71.23                            | 26.9                       | 30.79                               | 43.2             | 11.6                       |
| #4              | 49.04                            | 25.8                       | 24.28                               | 49.5             | 12.8                       |
| Mean $\pm$ SD * |                                  | 27.0 $\pm$ 4.0             | 23.72 $\pm$ 7.5                     | 43.6 $\pm$ 4.1   | 11.7 $\pm$ 1.7             |

\* Data are means  $\pm$  SD.

**Figure S1.** Mass spectra fragmentation patterns of the UP sample (A) and the standard PUFA No. 3 (from menhaden oil) (B). The following fatty acids were identified in the UP sample after methyl esterification and comparison with the mass fragmentation spectra of the standards (PUFA No. 3): (a) palmitic acid (C16:0), (b) *cis*-8,11,14,17-eicosatetraenoic acid C20:4 ( $\omega$ -3), (c) Stearic acid (C18:0), (d) *cis*-5,8,11,14-eicosatetraenoic acid C20:4 ( $\omega$ -6), (e) *cis*-5,8,11,14,17-eicosapentaenoic acid C20:5 ( $\omega$ -3), (f) *cis*-4,7,10,13,16,19-docosahexaenoic acid C22:6 ( $\omega$ -3).

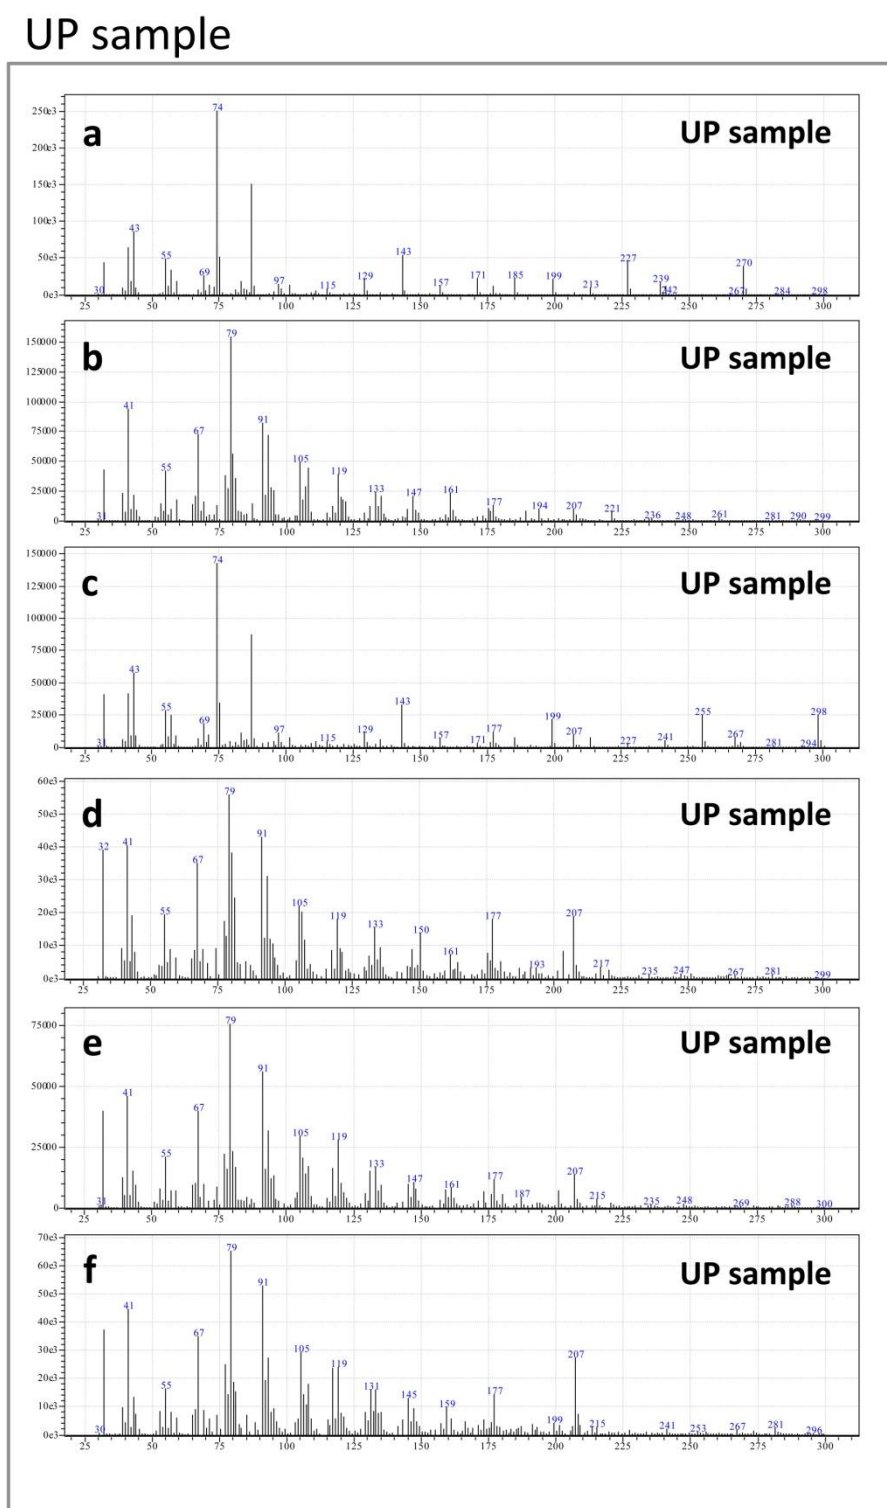

(A)

Figure S1. Cont.

## Standard PUFA Mix No. 3

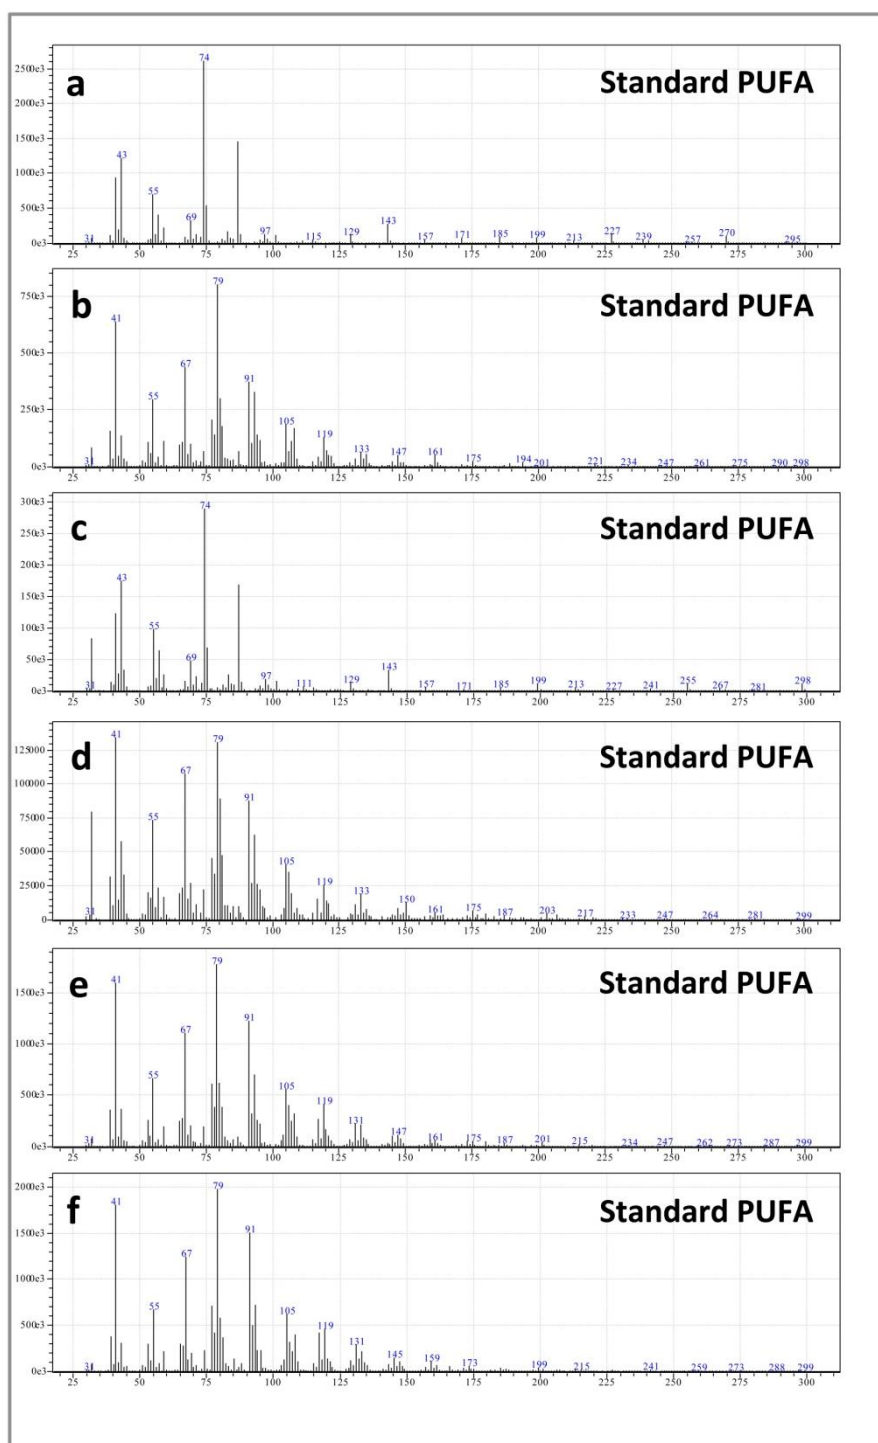

(B)
